# Supplementary material for: Untargeted Metabolomics Analysis Revealed Lipometabolic Disorders in Perirenal Adipose Tissue of Rabbits Subject to a High-fat Diet
Source: Research Square preprint supplement (doi:10.21203/rs.3.rs-510062/v1), 2021-05-17
Supplement: Supplementary file 1 [file b0fbe015af4c70def65aac37.xlsx]

## Sheet: HFD.vs.SND.
KEGG enrichment analysis of differential negative metabolites
MapID	MapTitle	Pvalue	x	y	n	N	EnrichDirect	MetaIDs	kegg_cpd_id
map04611	Platelet activation	0.00699126	2	2	8	90	Over	Prostaglandin G2, Arachidonic acid	cpd:C05956,cpd:C00219
map00590	Arachidonic acid metabolism	0.00834617	3	6	8	90	Over	Lipoxin B4, Prostaglandin G2, Arachidonic acid	cpd:C06315,cpd:C05956,cpd:C00219
map04913	Ovarian steroidogenesis	0.0200204	2	3	8	90	Over	Arachidonic acid, 2-Hydroxyestradiol	cpd:C00219,cpd:C05301
map01040	Biosynthesis of unsaturated fatty acids	0.0306116	3	9	8	90	Over	Docosahexaenoic acid, Arachidonic acid, Adrenic acid	cpd:C06429,cpd:C00219,cpd:C16527
map04216	Ferroptosis	0.0382163	2	4	8	90	Over	Arachidonic acid, Adrenic acid	cpd:C00219,cpd:C16527
map04726	Serotonergic synapse	0.0382163	2	4	8	90	Over	Prostaglandin G2, Arachidonic acid	cpd:C05956,cpd:C00219
map04217	Necroptosis	0.0888889	1	1	8	90	Over	Arachidonic acid	cpd:C00219
map04270	Vascular smooth muscle contraction	0.0888889	1	1	8	90	Over	Arachidonic acid	cpd:C00219
map04666	Fc gamma R-mediated phagocytosis	0.0888889	1	1	8	90	Over	Arachidonic acid	cpd:C00219
map04723	Retrograde endocannabinoid signaling	0.0888889	1	1	8	90	Over	Arachidonic acid	cpd:C00219
map04730	Long-term depression	0.0888889	1	1	8	90	Over	Arachidonic acid	cpd:C00219
map04912	GnRH signaling pathway	0.0888889	1	1	8	90	Over	Arachidonic acid	cpd:C00219
map04923	Regulation of lipolysis in adipocytes	0.0888889	1	1	8	90	Over	Arachidonic acid	cpd:C00219
map00591	Linoleic acid metabolism	0.170787	1	2	8	90	Over	Arachidonic acid	cpd:C00219
map00592	alpha-Linolenic acid metabolism	0.170787	1	2	8	90	Over	13(S)-HOTrE	cpd:C16316
map04664	Fc epsilon RI signaling pathway	0.170787	1	2	8	90	Over	Arachidonic acid	cpd:C00219
map04750	Inflammatory mediator regulation of TRP channels	0.170787	1	2	8	90	Over	Arachidonic acid	cpd:C00219
map04921	Oxytocin signaling pathway	0.170787	1	2	8	90	Over	Arachidonic acid	cpd:C00219
map00140	Steroid hormone biosynthesis	0.315487	1	4	8	90	Over	2-Hydroxyestradiol	cpd:C05301
map04925	Aldosterone synthesis and secretion	0.315487	1	4	8	90	Over	Arachidonic acid	cpd:C00219
map04976	Bile secretion	0.58506	1	9	8	90	Over	Lithocholic Acid	cpd:C03990
MapID: The ID of the enriched KEGG PATHWAY
MapTitle: Enriched KEGG PATHWAY name
Pvalue: PValue of enrichment analysis
x: The number of differential metabolites associated with this pathway
y: Number of background (all) metabolites associated with this pathway
n: KEGG annotation of the number of differential metabolites
N: The number of background (all) metabolites in the KEGG annotation
EnrichDirect: The point of rich collection,Over stands for enrichment
MetaIDs: List of enriched metabolites
kegg_cpd_id: The ID of the KEGG database metabolite
