# Supplementary material for: Untargeted Metabolomics Analysis Revealed Lipometabolic Disorders in Perirenal Adipose Tissue of Rabbits Subject to a High-fat Diet
Source: Research Square preprint supplement (doi:10.21203/rs.3.rs-510062/v1), 2021-05-17
Supplement: Supplementary file 2 [file c27e0d50c5c5632e46a6413f.xlsx]

## Sheet: HFD.vs.SND
Total positive metabolites with significant difference were analyzed by LC-MS/MS
Name	Formula	Molecular Weight	RT [min]	Pvalue	VIP	Up or Down
oxidized phosphatidylserine(18:0-18:2+2O)	C42 H78 N O12 P	819.527	15.201	5.7e-05	1.88906	down
oxidized phosphatidylethanolamines(18:0-18:2+2O )	C41 H78 N O10 P	775.537	16.412	0.000236131	2.03919	down
oxidized phosphatidylserine (18:0-18:3+1O)	C42 H76 N O11 P	801.517	15.287	0.00028642	2.1252	down
oxidized phosphatidylcholines (18:0-18:2+2O)	C44 H84 N O10 P	877.605	16.297	0.000369377	2.23473	down
phosphatidylethanolamines (17:1/18:1)	C40 H76 N O8 P	729.532	16.438	0.000561117	2.00432	down
phosphatidylethanolaminestOH (18:1-18:2)	C41 H75 O8 P	726.53	16.022	0.000565422	1.69363	down
Oxphosphatidylethanolamines (18:1-18:3+1O )	C41 H74 N O9 P	755.511	16.247	0.00069033	2.16604	down
2,3-dinor Prostaglandin E1	C18 H30 O5	308.199	11.924	0.000703915	1.58364	down
Methyltestosterone	C20 H30 O2	302.225	14.414	0.000976912	2.3487	up
Oxphosphatidylcholines (16:0-18:2+2O)	C42 H80 N O10 P	849.574	15.789	0.00104623	2.06136	down
phosphatidylcholines (2:0/16:1)	C26 H50 N O8 P	595.349	13.322	0.00104821	1.56397	down
phosphatidylethanolaminestOH (15:1-18:2)	C38 H69 O8 P	684.473	16.225	0.00120746	1.92817	down
oxidized phosphatidylserine (18:0-18:1+1O(1Cyc))	C42 H78 N O11 P	803.532	15.223	0.00124173	2.05448	down
Oxphosphatidylethanolamines (16:0-18:2+2O )	C39 H74 N O10 P	747.506	15.601	0.00125356	2.16897	down
(±)9-HpODE	C18 H32 O4	624.461	13.787	0.00128877	1.28101	down
Prostaglandin F3α	C20 H32 O5	388.199	11.615	0.00142878	2.08665	down
phosphatidylethanolaminestOH (18:2-18:2)	C41 H73 O8 P	724.513	15.819	0.0014911	2.25034	down
Corchorifatty acid F	C18 H32 O5	328.225	10.934	0.00176044	2.01465	down
6α-Prostaglandin I1	C20 H34 O5	354.241	12.472	0.00180817	1.5313	down
Prostaglandin E3	C20 H30 O5	386.184	12.373	0.00223579	1.31421	down
(±)10(11)-EpDPA	C22 H32 O3	344.235	13.925	0.00228273	2.16851	down
phosphatidylethanolamines (18:2/20:4)	C43 H74 N O8 P	763.501	15.487	0.00245186	1.85693	down
19-Nortestosterone	C18 H26 O2	274.193	12.146	0.00265136	1.60807	down
GlcADG (13:0-18:2)	C40 H70 O11	726.483	16.213	0.00303476	2.04357	down
Dodecanedioic acid	C12 H22 O4	230.152	11.289	0.0031706	1.62434	down
Docosahexaenoic acid	C22 H32 O2	328.24	14.209	0.00332569	1.90978	up
Ginkgoic acid	C22 H34 O3	346.251	14.194	0.00332714	1.89925	up
phosphatidylethanolamines (2:0/18:1)	C25 H48 N O8 P	521.311	14.223	0.00349931	1.9584	down
FAHFA (18:2/17:2)	C35 H60 O4	544.447	14.247	0.00362093	1.75932	down
Oxphosphatidylcholines (18:1-18:2+2O)	C44 H82 N O10 P	875.59	16.33	0.00362868	2.06797	down
Lithocholic Acid	C24 H40 O3	376.298	13.732	0.00384635	1.56795	down
Cmp_257	C20 H32 O5	334.213	12.472	0.00399441	1.39386	down
11-deoxy Corticosterone	C21 H30 O3	376.222	11.138	0.00447745	1.69479	down
Oxphosphatidylcholines (18:0-18:1+3O)	C44 H86 N O11 P	895.617	15.506	0.00472119	2.06245	down
13,14-Dihydro-15-keto-tetranor prostaglandin F1α	C16 H28 O5	300.193	9.79	0.00492482	1.2524	down
11(Z),14(Z)-Eicosadienoic acid	C20 H36 O2	308.271	14.698	0.00494291	1.6293	up
13-Hpotre(R)	C18 H30 O4	310.214	12.864	0.00535069	1.59132	down
Lipoxin B4	C20 H32 O5	352.222	11.278	0.00545095	1.5708	down
8-iso Prostaglandin A2	C20 H30 O4	316.201	13.04	0.00600383	2.25562	down
Lipopolysaccharide 18:2	C24 H44 N O9 P	521.275	13.894	0.00609825	1.83927	up
Taurohyocholic acid sodium salt	C26 H44 N Na O7 S	537.275	13.189	0.00652181	2.08512	down
2-Hydroxyestradiol	C18 H24 O3	288.172	10.513	0.00699578	1.10049	down
oxidized phosphatidylserine (18:1-18:0+1O)	C42 H80 N O11 P	805.547	15.331	0.00791783	1.86723	down
3,8,9-trihydroxy-10-propyl-3,4,5,8,9,10-hexahydro-2H-oxecin-2-one	C12 H20 O5	244.131	6.661	0.00828459	1.47833	down
PG (18:0/22:4)	C46 H83 O10 P	826.575	16.422	0.00859578	1.84997	down
8Z,11Z,14Z-Eicosatrienoic acid	C20 H34 O2	306.255	14.473	0.00876046	1.7301	up
β-D-Glucopyranuronic acid	C6 H10 O7	194.043	1.189	0.00905712	1.67743	down
13,14-dihydro-15-keto-PGD2	C20 H32 O5	352.226	12.467	0.00917221	1.54534	down
oxidized PG (16:0-18:2+2O)	C40 H75 O12 P	778.5	14.932	0.00944243	1.35819	down
LPG 17:0	C23 H47 O9 P	498.296	14.239	0.00954326	1.57183	down
Dihydroroseoside	C19 H32 O8	388.214	14.434	0.00959641	2.1871	up
4-phenylbenzo[4,5]imidazo[1,2-a]pyrimidin-2-amine	C16 H12 N4	260.104	7.918	0.00965486	1.89825	down
LPG 15:0	C21 H43 O9 P	470.265	13.867	0.0104676	1.40346	down
phosphatidylcholines (2:0/16:0)	C26 H52 N O8 P	597.365	13.637	0.0107213	1.67871	down
FAHFA (18:2/8:0)	C26 H46 O4	422.34	14.811	0.0132581	1.58622	down
Oxphosphatidylcholines (18:1-18:1+3O)	C44 H84 N O11 P	893.6	15.187	0.0134713	1.49339	down
Adrenic acid	C22 H36 O2	332.271	14.649	0.0153002	1.73259	up
13(S)-HOTrE	C18 H30 O3	294.219	16.199	0.0154911	1.80604	down
Oxphosphatidylcholines (18:1-18:2+1O)	C44 H82 N O9 P	859.595	16.337	0.0161605	1.33944	down
2-Aminoadipic acid	C6 H11 N O4	161.069	1.187	0.0172611	1.91702	down
Oxphosphatidylethanolamines (18:1-18:2+2O )	C41 H76 N O10 P	773.522	16.044	0.0174966	2.08735	down
Prostaglandin G2	C20 H32 O6	368.22	11.612	0.0179398	1.10743	down
Hexanoic acid	C6 H12 O2	116.084	8.232	0.01945	1.69407	down
15-keto Prostaglandin E1	C20 H32 O5	352.225	12.412	0.0206596	1.15058	down
Lipopolysaccharide 18:0	C24 H48 N O9 P	525.306	14.412	0.0219282	1.5451	down
phosphatidylethanolaminesntadecanoic acid	C15 H30 O2	242.224	14.222	0.0240646	1.64402	down
3-O-β-D-Glucopyranosylandrographolide	C26 H40 O10	512.261	12.476	0.0244199	1.24176	down
Azelaic acid	C9 H16 O4	188.105	5.221	0.0246582	1.32353	down
(±)12(13)-DiHOME	C18 H34 O4	314.245	12.284	0.0249639	1.16286	down
Prostaglandin A1	C20 H32 O4	336.229	13.51	0.0299621	1.46962	down
Oxphosphatidylethanolamines (16:0-18:1+1O(1Cyc))	C39 H74 N O9 P	731.512	15.982	0.0340714	1.44069	down
PG (18:2/18:2)	C42 H75 O10 P	770.512	15.412	0.0341839	1.6424	down
OxPG (18:1-18:2+2O)	C42 H77 O12 P	804.516	14.993	0.034541	1.05743	down
Lysophosphatidyl inositols 17:0	C26 H51 O12 P	586.312	14.209	0.0361296	1.3612	down
Arachidonic acid	C20 H32 O2	304.24	14.263	0.0418687	1.23533	up
5-Aminoimidazole-4-carboxamide-1-beta-d-ribofuranosyl 5-monophosphate	C9 H15 N4 O8 P	338.061	1.278	0.0435839	1.74551	down
3-Hydroxy-3-methylglutaric acid	C6 H10 O5	162.053	1.193	0.0437054	1.44202	down
L-Threonic acid	C4 H8 O5	136.037	1.199	0.0449608	1.76198	down
Suberic acid	C8 H14 O4	174.089	2.184	0.0456129	1.4981	down
PG (18:2/20:4)	C44 H75 O10 P	794.511	15.605	0.0469537	1.03947	up
Lphosphatidylcholines 19:0	C27 H56 N O7 P	597.401	15.577	0.048592	2.00314	down
RT [min]= retention time.
VIP= the importance projection of variables is used to reflect the contribution of quantitative value of each sample to the difference, generally, VIP > 1.
Pvalue (HFD vs SND): *P < 0.05; **P < 0.01.
